# Supplementary material for: Novel porous organocatalysts for cycloaddition of CO2and epoxides
Source: Royal Society of Chemistry journal article supplement (doi:10.1039/c9ra05466a), 2019-01-01

## Supplementary information

### New Porous Organocatalysts for Cycloaddition of CO<sub>2</sub> and Epoxides

*Joel M. Kolle and Abdelhamid Sayari\**

Centre for Catalysis Research and Innovation (CCRI), Department of Chemistry and Biomolecular Sciences, University of Ottawa, Ottawa, Ontario, Canada K1N 6N5

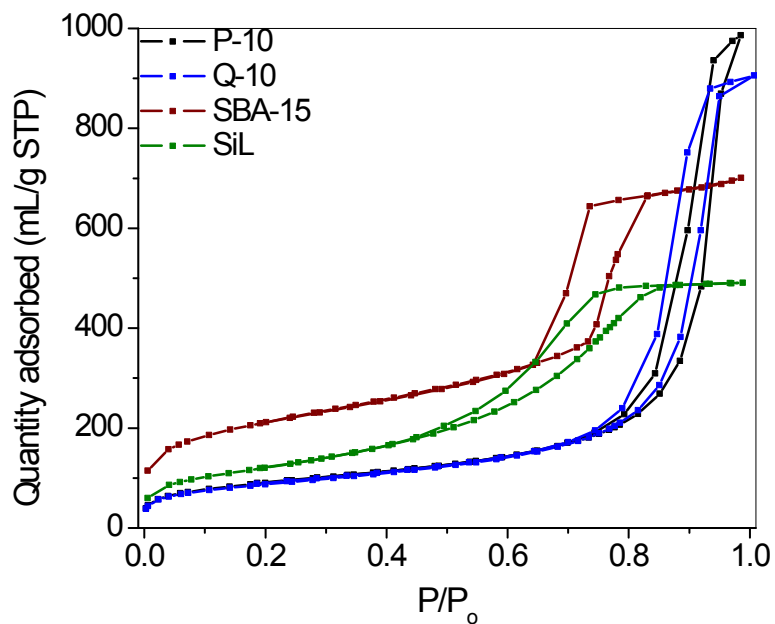

Figure S1. Nitrogen adsorption–desorption isotherms of pristine supports

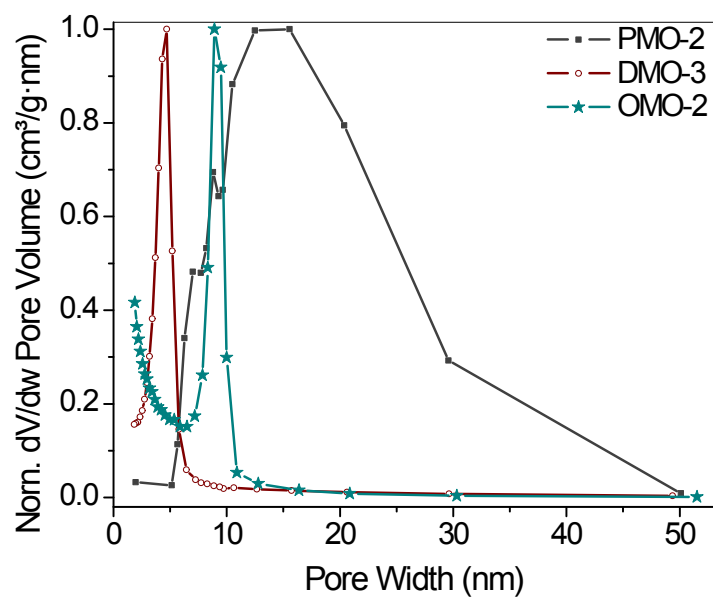

Figure S2. Pore size distribution for representative organosilicas

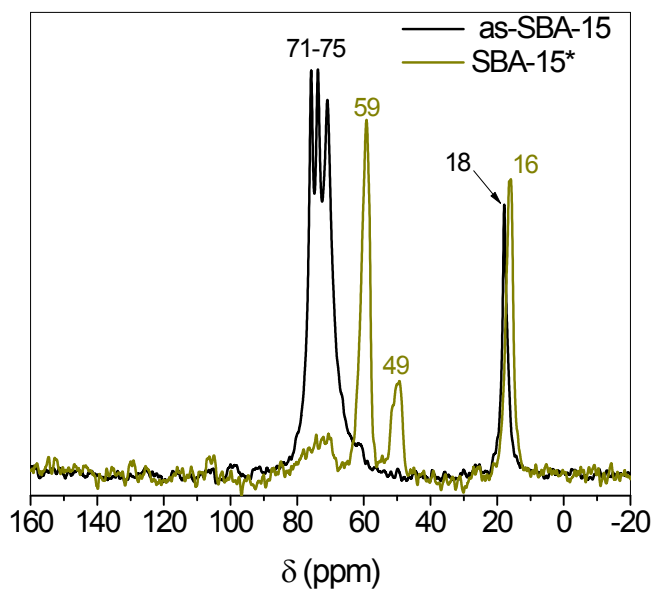

Figure S3.  $^{13}\text{C}$  CP-MAS NMR of SBA-15; (black) as-synthesized, as-SBA-15 and (dark yellow) solvent-extracted (SBA-15\*)

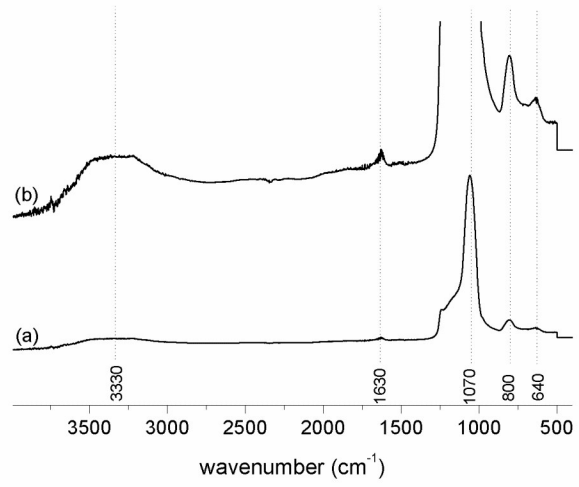

Figure S4: ATR-IR spectra of silica support (similar spectra were obtained for all support materials)

## $^1\text{H}$ and $^{13}\text{C}$ NMR spectra of cyclic carbonates

$^1\text{H}$  NMR (400 MHz,  $\text{CDCl}_3$ ):  $\delta$  = 1.50 (d, 3H,  $\text{CH}_3$ ), 3.81 (dd, 1H,  $\text{CH}_2$ ), 4.38 (dd, 1H,  $\text{CH}_2$ ), 4.67 (m, 1H, CH) ppm

$^{13}\text{C}$  NMR (400 MHz,  $\text{CDCl}_3$ )  $\delta$  = 18.83 ( $\text{CH}_3$ ), 70.41 ( $\text{CH}_2$ ), 73.80 (CH), 155.21 ( $\text{C}=\text{O}$ ) ppm

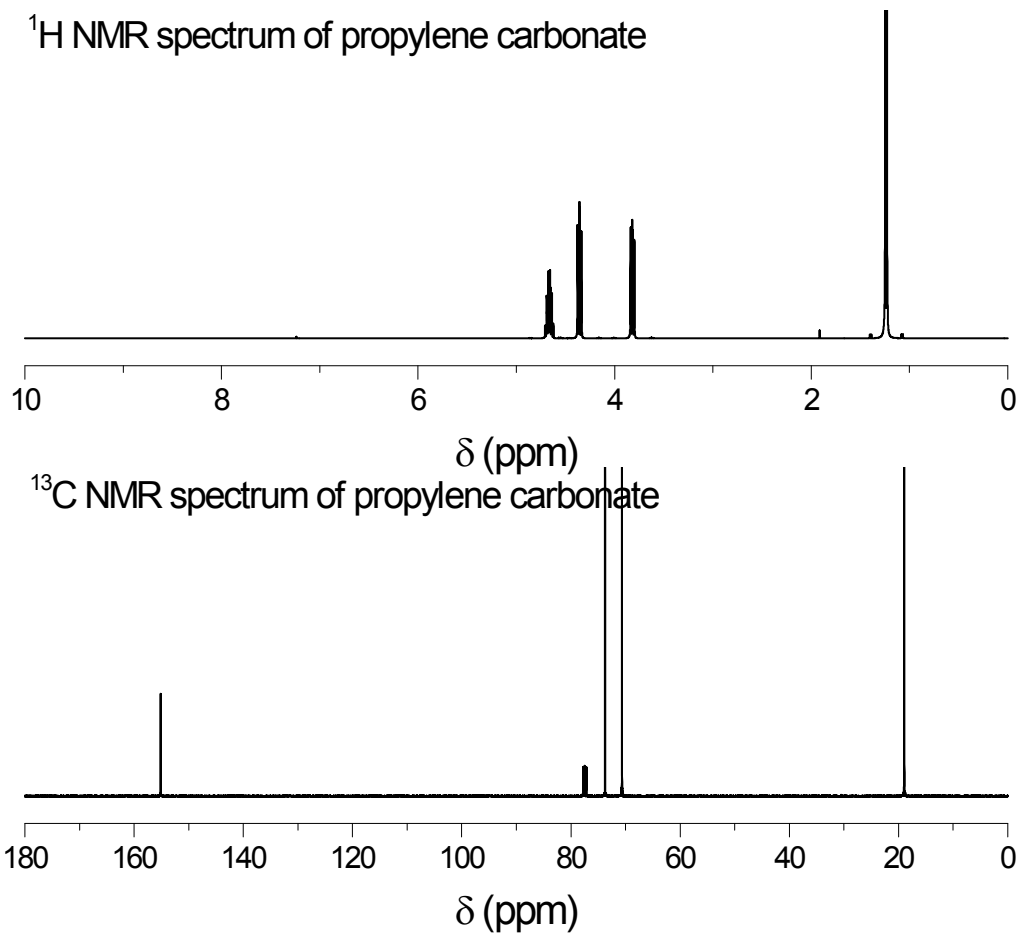

**1,2-butylene carbonate (or 4-Ethyl-1,3-dioxolan-2-one)**

$^1\text{H}$  NMR (400 MHz,  $\text{CDCl}_3$ ):  $\delta$  = 0.68 (t, 3H,  $\text{CH}_3$ ), 1.45 (m, 2H,  $\text{CH}_2$ ), 3.80 (dd, 1H,  $\text{CH}_2$ ), 4.25 (dd, 1H,  $\text{CH}_2$ ), 4.40 (p, 1H, CH), ppm.

$^{13}\text{C}$  NMR (400 MHz,  $\text{CDCl}_3$ )  $\delta$  = 7.98 ( $\text{CH}_3$ ), 26.35 ( $\text{CH}_2$ ), 68.90 ( $\text{CH}_2$ ), 78.02 (CH), 155.06 (C=O) ppm.

$^1\text{H}$  NMR spectrum of 1,2-butylene carbonate

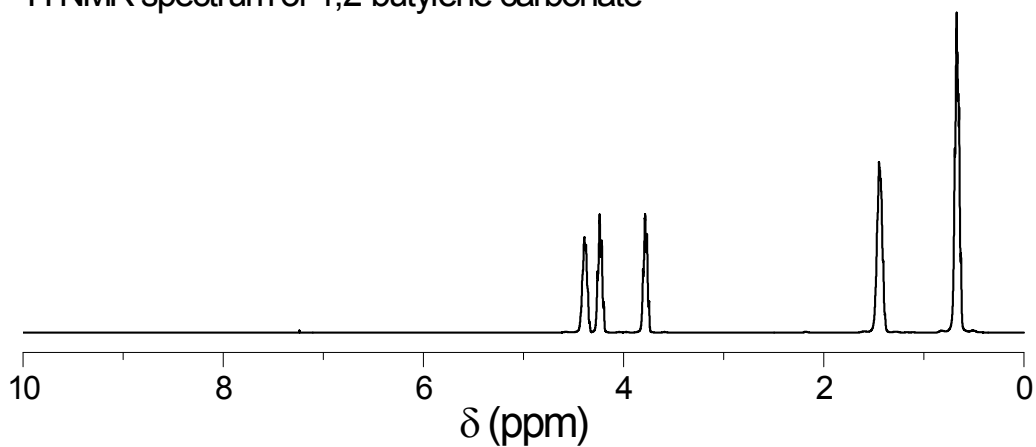

$^{13}\text{C}$  NMR spectrum of 1,2-butylene carbonate

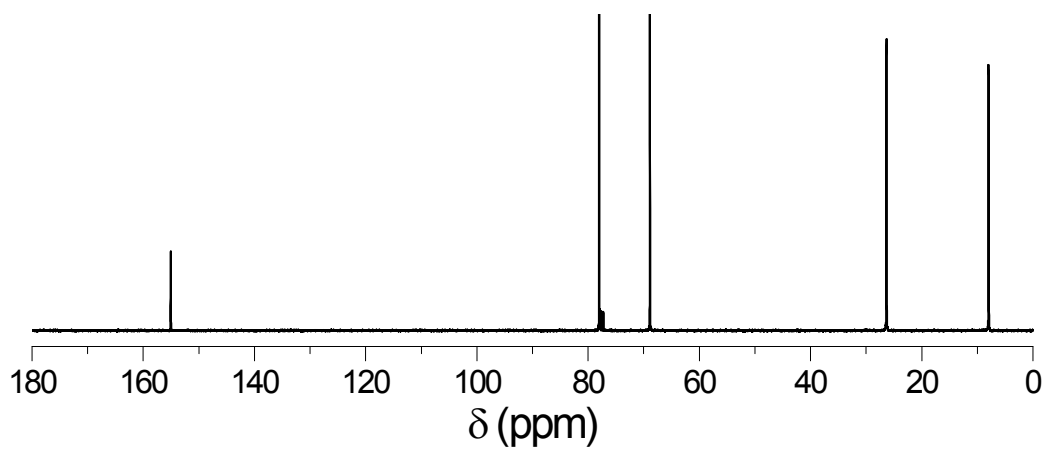

Styrene carbonate (or 4-Phenyl-1,3-dioxolan-2-one)

$^1\text{H}$  NMR (400 MHz,  $\text{CDCl}_3$ ) = 4.30 (dd, 1H), 4.77 (m, 1H), 5.65 (t, 1H), 7.33–7.40 (m, 5H) ppm.

$^{13}\text{C}$  NMR (400 MHz,  $\text{CDCl}_3$ ) = 71.20 ( $\text{CH}_2$ ), 77.95 (CH), 125.86 (CH), 129.15 (2xCH), 129.66 (2xCH), 135.80 (C), 154.86 (C=O) ppm.

$^1\text{H}$  NMR spectrum of styrene carbonate

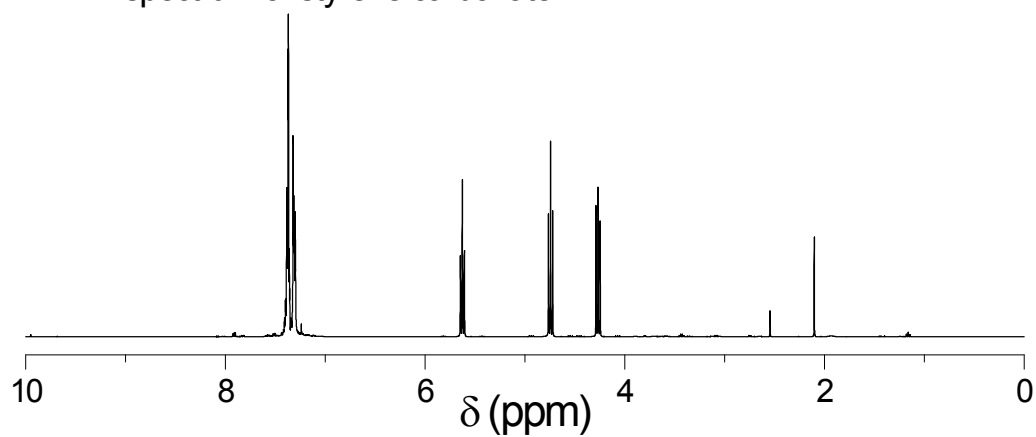

$^{13}\text{C}$  NMR spectrum of styrene carbonate

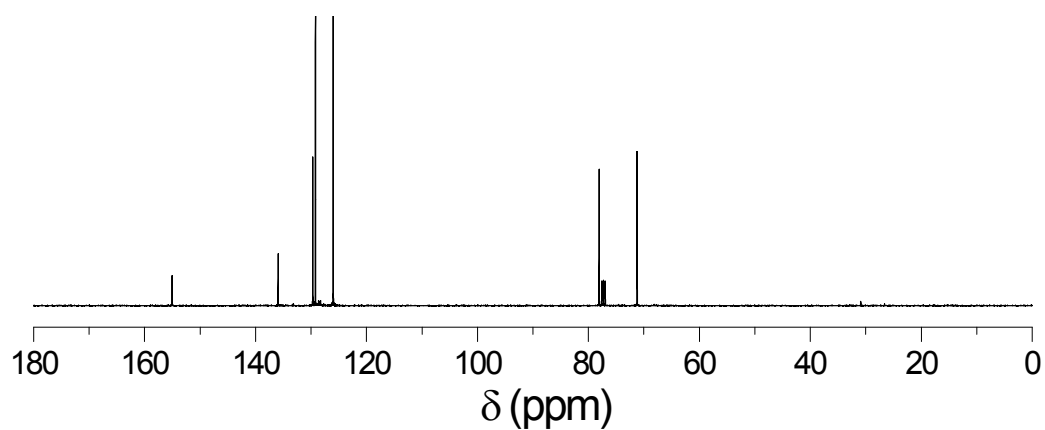

**4-(Chloromethyl)-1,3-dioxolan-2-one**

$^1\text{H}$  NMR (400 MHz,  $\text{CDCl}_3$ ) = 3.54–3.68 (m, 2H), 4.16 (dd, 1H), 4.40 (dd, 1H), 4.87 (m, 1H) ppm.

$^{13}\text{C}$  NMR (400 MHz,  $\text{CDCl}_3$ ) = 44.77 ( $\text{CH}_2$ ), 67.10 ( $\text{CH}_2$ ), 74.70 ( $\text{CH}$ ), 155.20 ( $\text{C}=\text{O}$ ) ppm.

$^1\text{H}$  NMR spectrum of 4-(Chloromethyl)-1,3-dioxolan-2-one

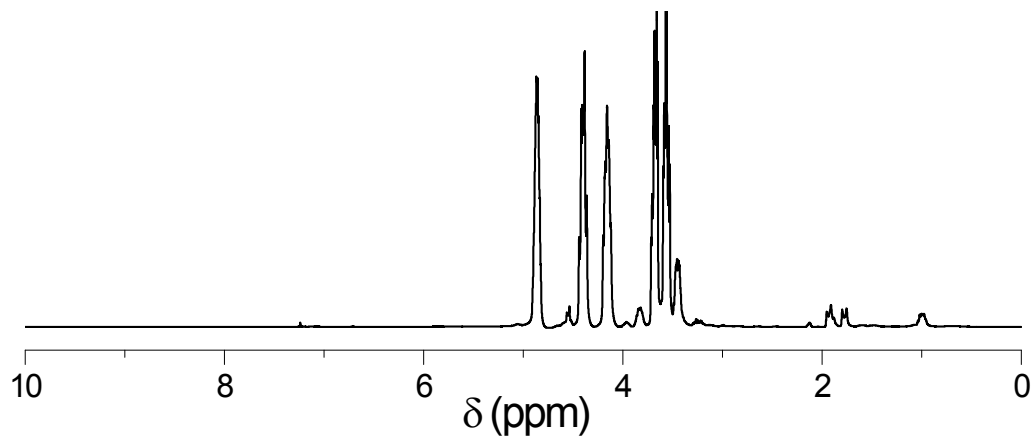

$^{13}\text{C}$  NMR spectrum of 4-(Chloromethyl)-1,3-dioxolan-2-one

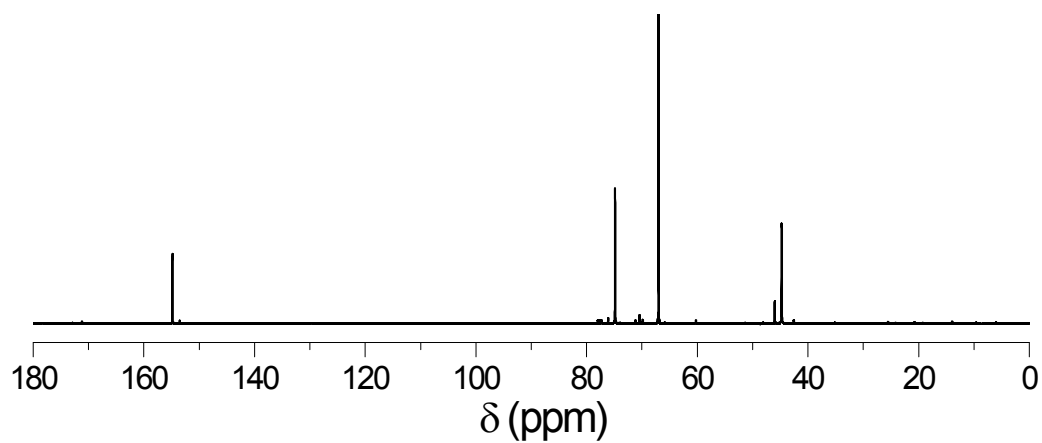

**hexahydrobenzo[*d*][1,3]dioxol-2-one**

$^1\text{H}$  NMR (400 MHz,  $\text{CDCl}_3$ ) = 4.71–4.66 (m, 2H), 1.94–1.82 (m, 4H), 1.66–1.55 (m, 2H), 1.46–1.37 (m, 2H).

$^{13}\text{C}$  NMR (101 MHz,  $\text{CDCl}_3$ ) = 155.5 (C=O), 75.5 (CH), 26.4 ( $\text{CH}_2$ ), 24.1 ( $\text{CH}_2$ )

$^1\text{H}$  NMR spectrum of hexahydrobenzo[*d*][1,3]dioxol-2-one

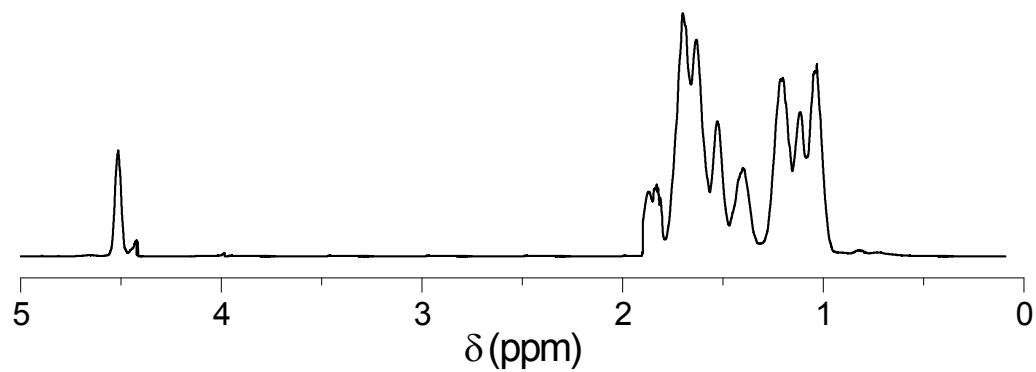

$^{13}\text{C}$  NMR spectrum of hexahydrobenzo[*d*][1,3]dioxol-2-one

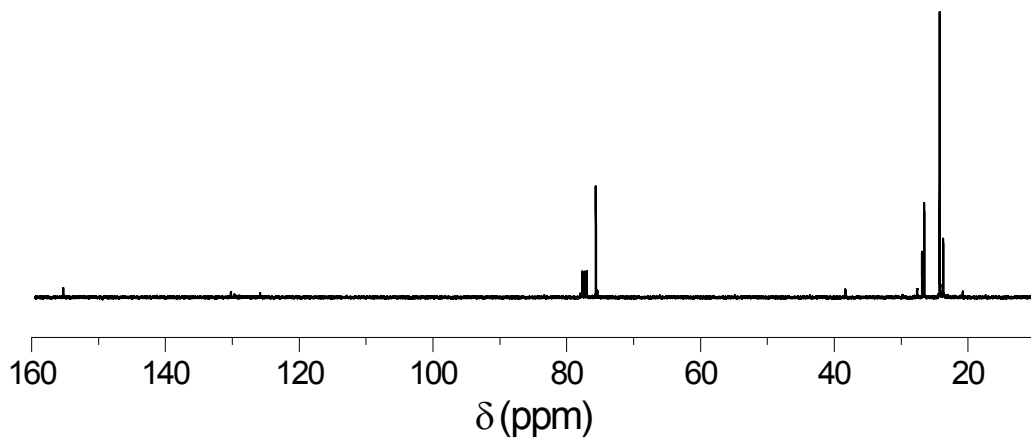

Supplement: c9ra05466a1.pdf [file c9ra05466a1.pdf]
